# Supplementary material for: Validation and Application of a New Reversed Phase HPLC Method forIn VitroDissolution Studies of Rabeprazole Sodium in Delayed-Release Tablets
Source: Hindawi journal article supplement (doi:10.1155/2013/976034), 2013-01-01
Supplement: f1 [file 976034.f1.pdf]

## SUPPLEMENTARY MATERIAL

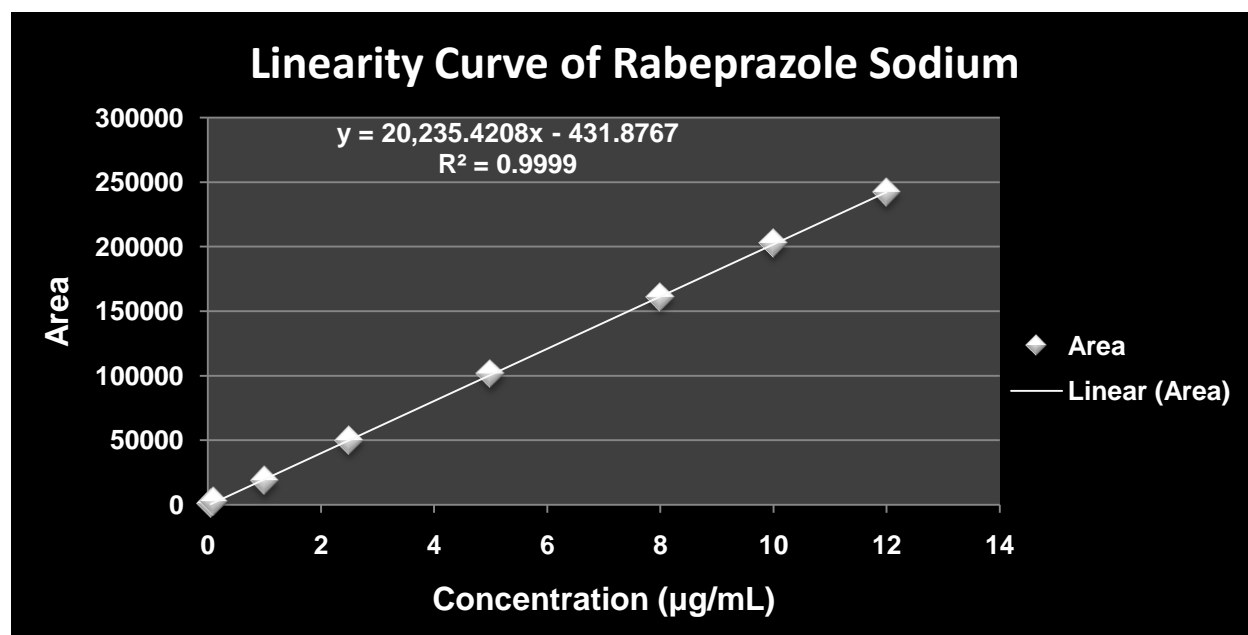

In this proposed RP-HPLC method the linear regression equation for RPS was found,  $y = 20,235x - 432$ , ( $R^2 = 0.9999$ ) by plotting peak area (y) versus the concentration (x). The results show that an excellent correlation exists between peak areas and concentration of drugs.
